# Supplementary material for: The prognostic value of tumor mutational burden and immune cell infiltration in esophageal cancer patients with or without radiotherapy
Source: publisher site journal article supplement (doi:10.18632/aging.102917), 2020-03-12
Supplement: Supplementary file [file aging-v12i5-102917-supplementary-material-SD1.pdf]

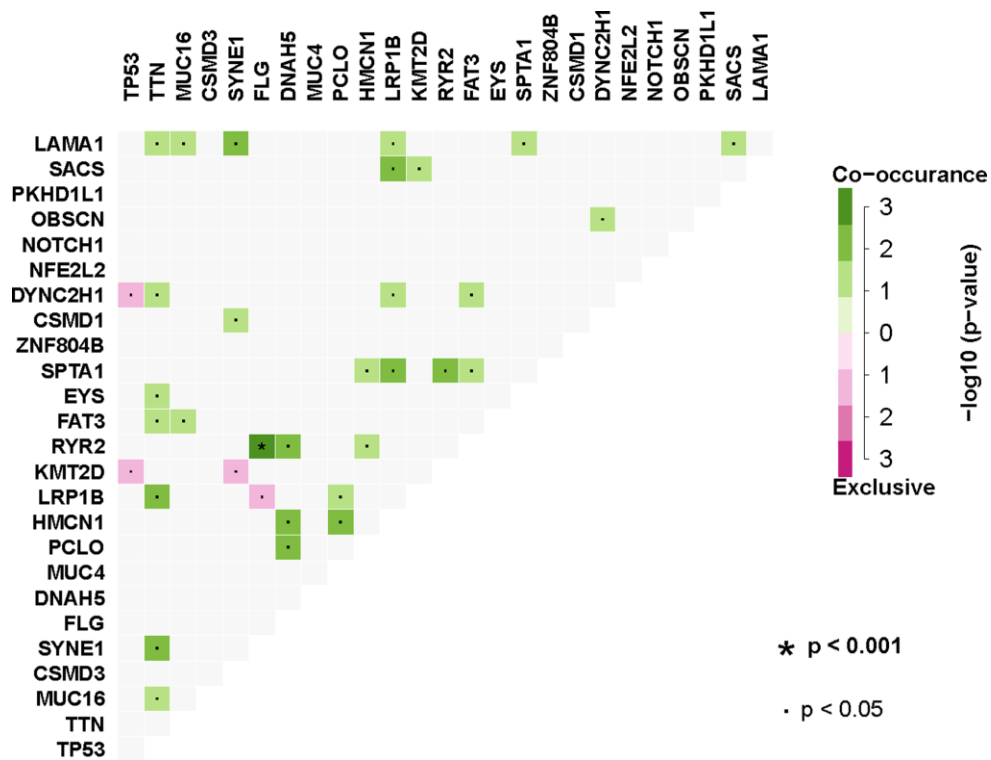

Supplementary Figure 2. The coincident and exclusive associations across mutated genes.

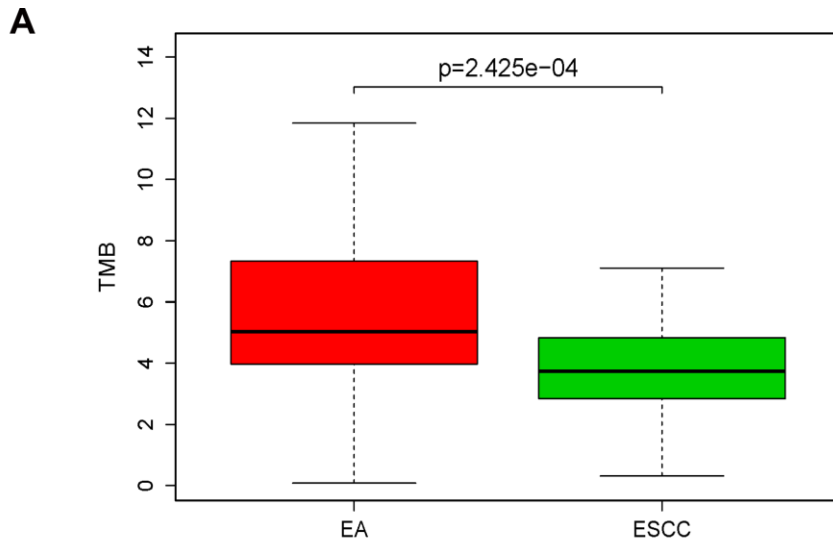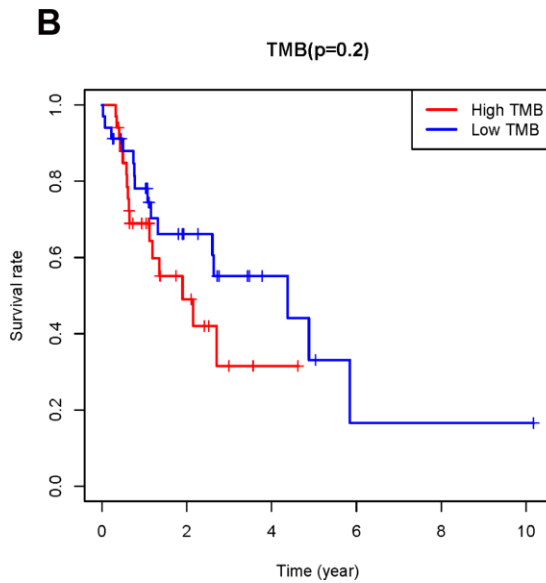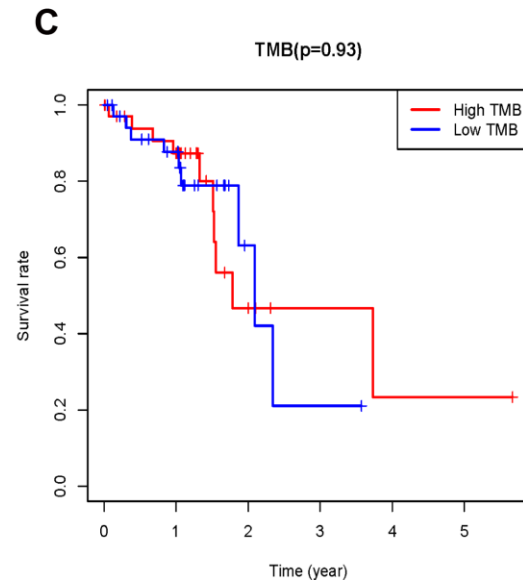

**Supplementary Figure 3. The TMB level in different EC subtypes.** (A) The level of TMB in EA was significantly higher than that in ESCC; (B, C) There was no significant difference of OS between the 2 tumor subtypes.
